# Supplementary material
Source: publisher site journal article supplement (https://www.dovepress.com/article/555943)
Supplement: Supplementary file 1 [file 555943_supplementary%20materials.docx]

**Table S1.** Association of different doses of rivaroxaban and composite outcomes (A) or major bleeding (B) via fine-gray competing risk model

|  | **Composite outcomes** | | **Major bleeding** | |
| --- | --- | --- | --- | --- |
|  | **SHR (95%CI)** | **P value** | **SHR (95%CI)** | **P value** |
| **5 mg** | Reference |  | Reference |  |
| **10 mg** | 0.73 (0.46-1.17) | 0.190 | 2.16 (0.88-5.28) | 0.093 |
| **15/20 mg** | 0.92 (0.53-1.57) | 0.750 | 4.09 (1.61-10.39) | 0.003 |

**Abbreviations: SHR, Subdistribution Hazard Ratio**

**Table S2.** The risk difference and relative risk estimated by TMLE method

| **Items** | **Groups** | **RD (95%CI)** | **P value** | **RR (95%CI)** | **P value** |
| --- | --- | --- | --- | --- | --- |
| **Composite outcomes** | 10mg | -0.023  (-0.058-0.011) | 0.186 | 0.743  (0.485-1.140) | 0.174 |
| 15/20mg | 0.006  (-0.044-0.055) | 0.820 | 1.067  (0.613-1.859) | 0.819 |
| **Major bleeding** | 10mg | 0.019  (-0.001-0.038) | 0.058 | 2.154  (0.891-5.207) | 0.088 |
| 15/20mg | 0.049  (0.023-0.075) | <0.001 | 4.361  (1.727-11.010) | 0.002 |

**Abbreviations: RD, Risk Difference; RR, Relative Risk**


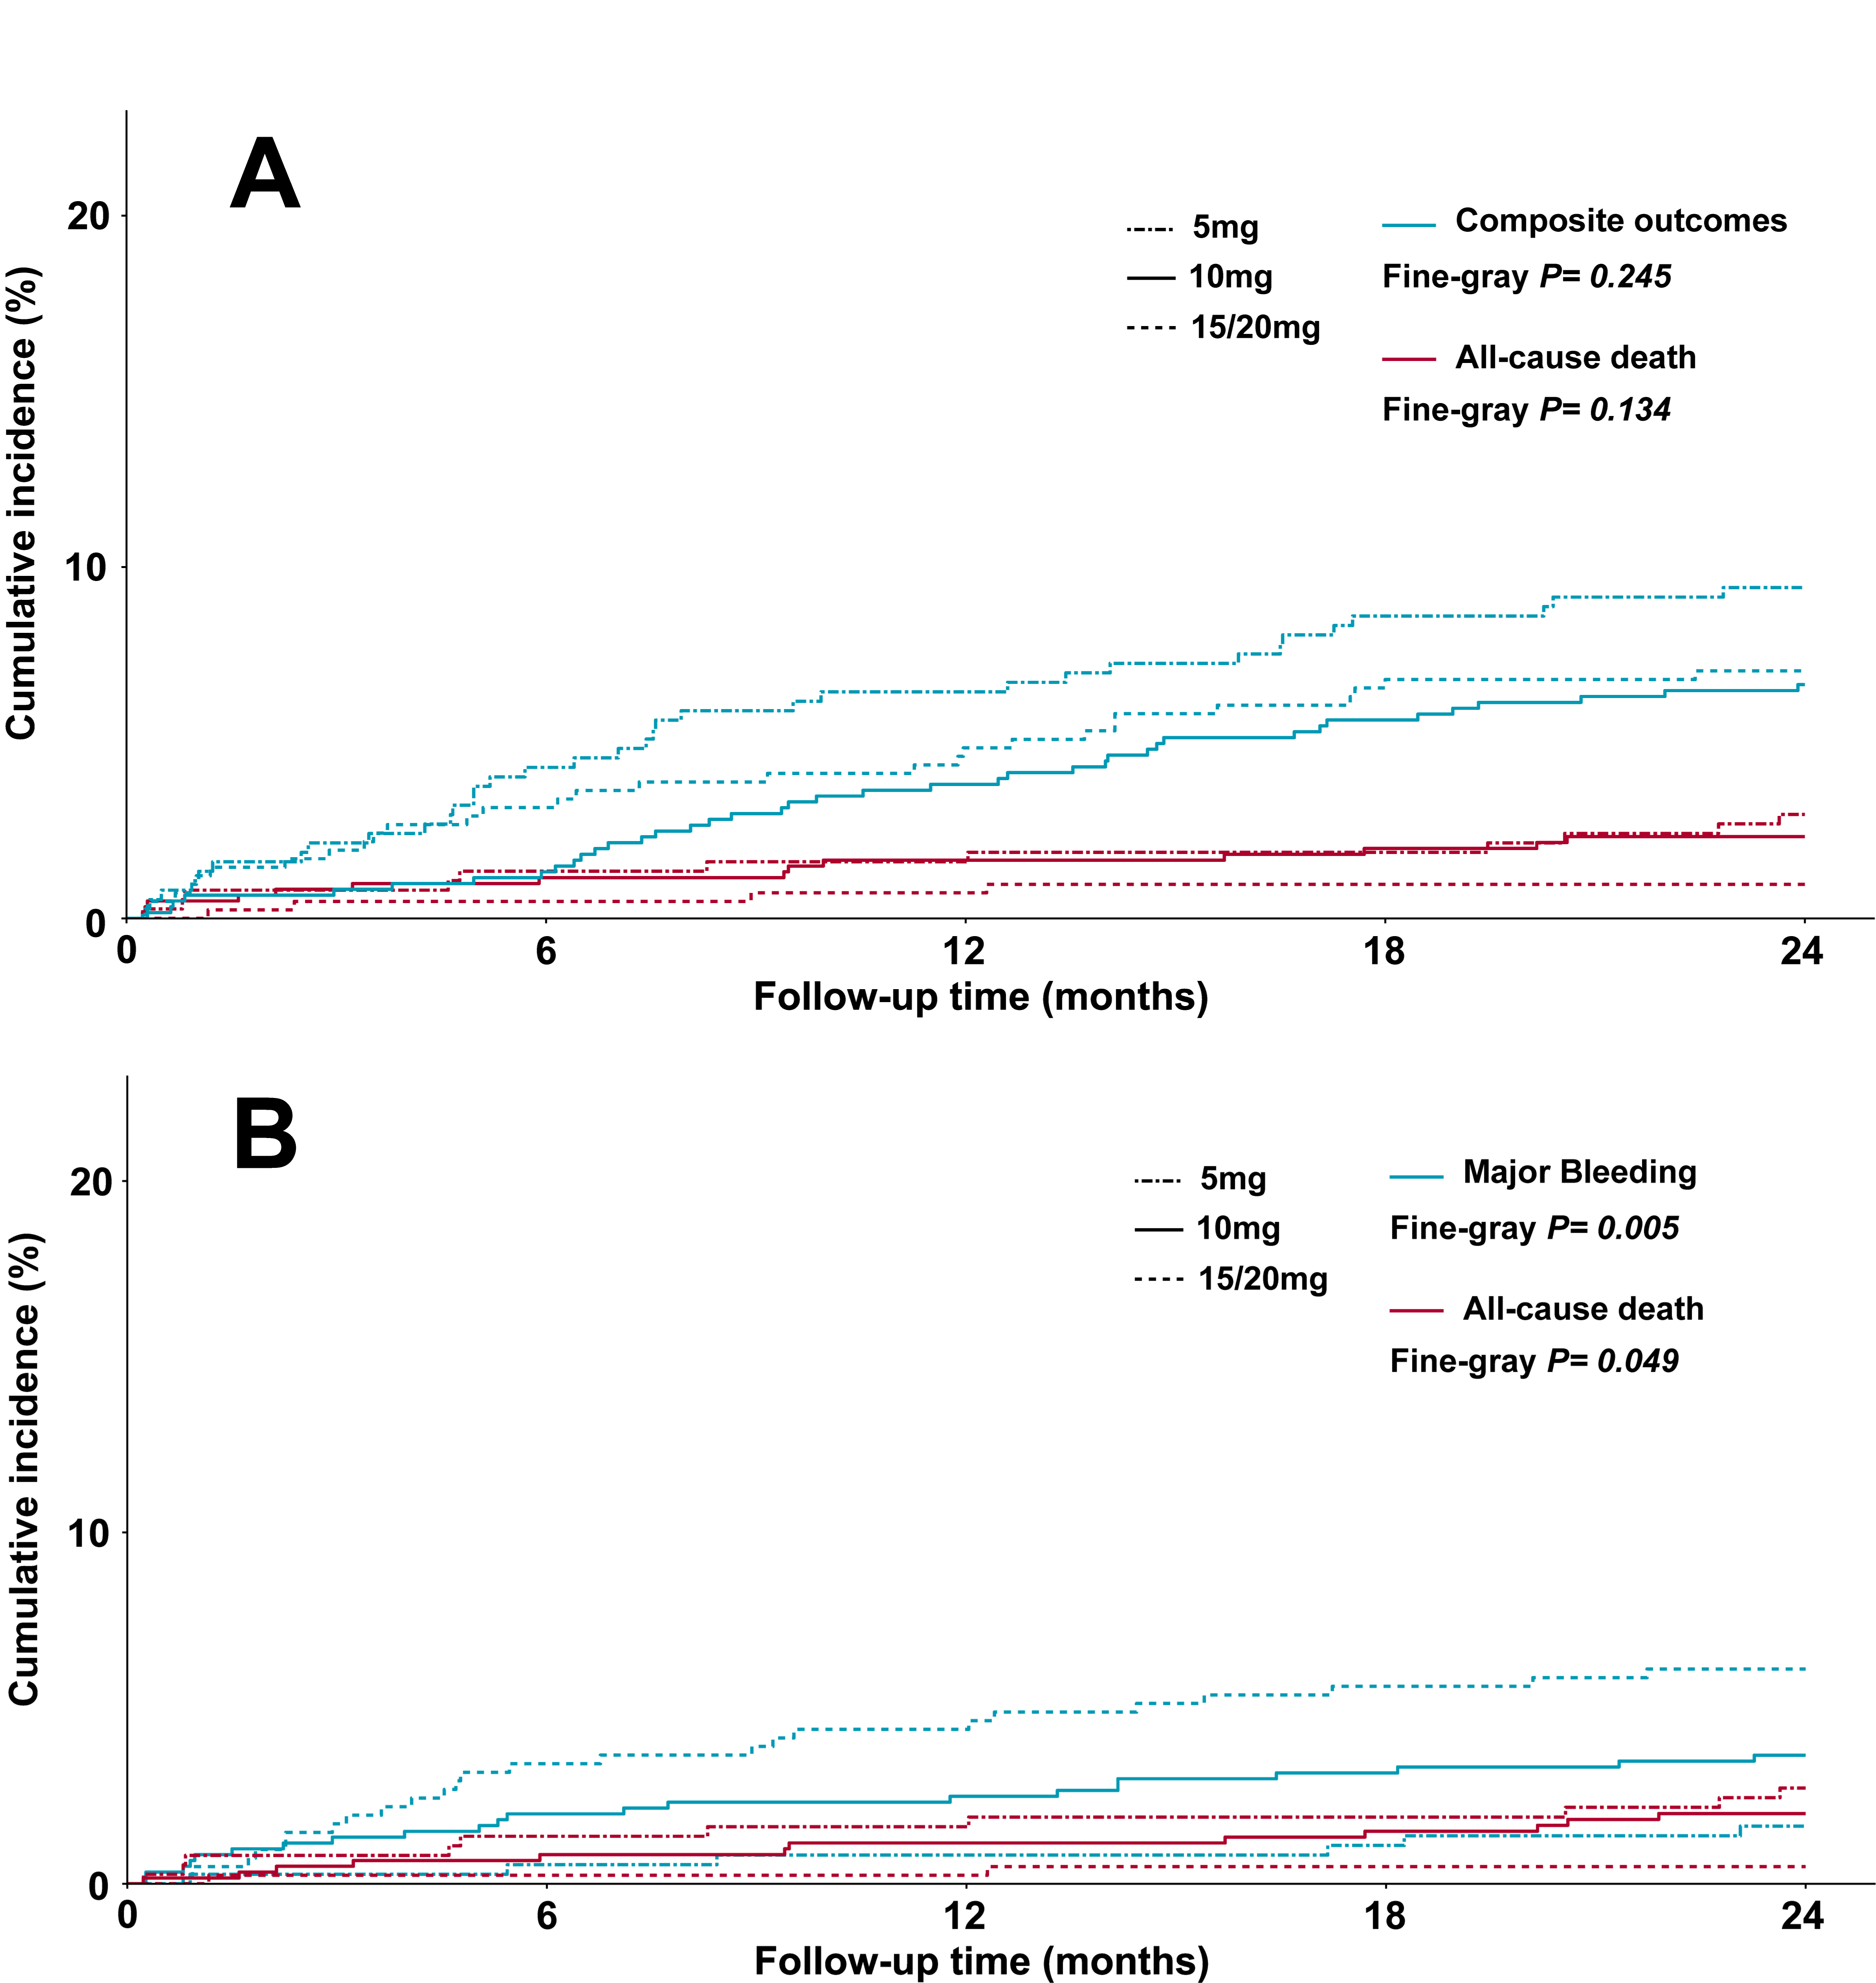


**Figure S1.** Association between different doses of rivaroxaban and composite outcomes (A) or major bleeding (B) with non-cardiovascular death as a competing risk (Fine-Gray competing risk model)

**
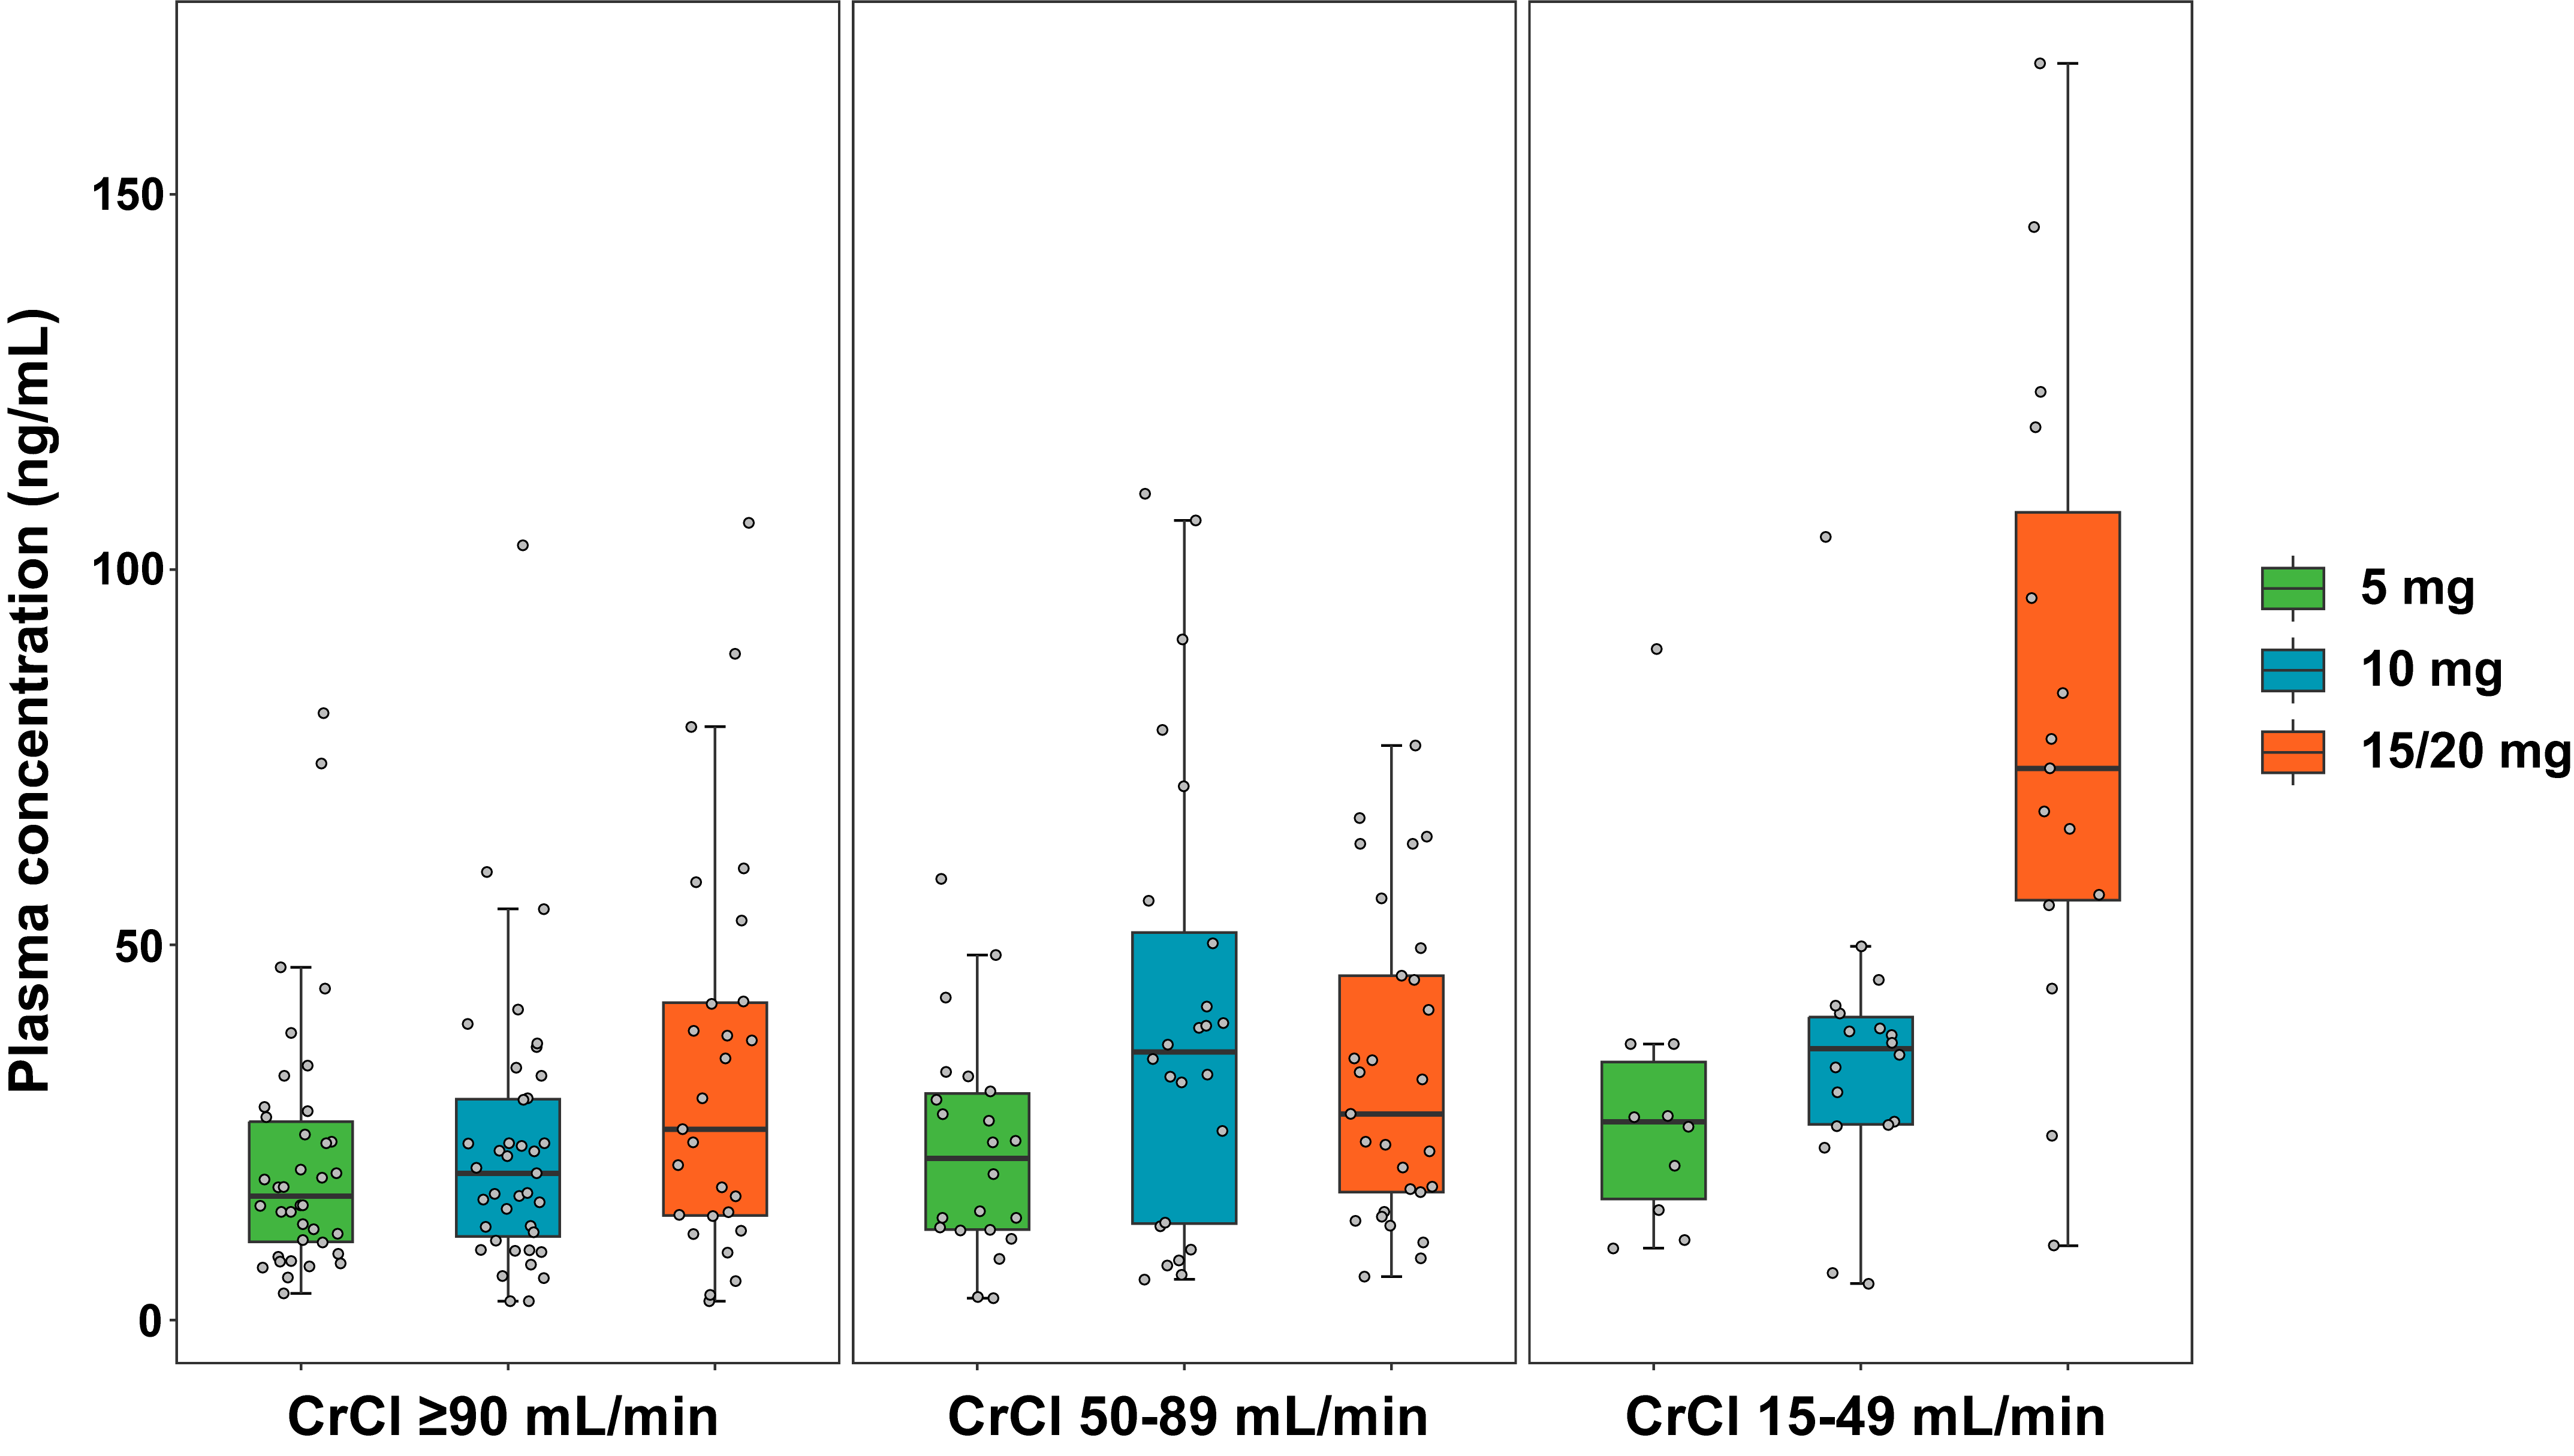
**

**Figure S2.** Plasma trough concentrations (ng/mL) of patients in different rivaroxaban dose groups stratified according to CrCl category
